# Supplementary material for: Enhancing the optical properties of hydrophilic Ag2Se NIR-II quantum dots by using chemometric approaches towards (bio)sensing applications
Source: Royal Society of Chemistry journal article supplement (doi:10.1039/d4nj01384k), 2024-01-01
Supplement: d4nj01384k1.pdf [file d4nj01384k1.pdf]

## Enhancing the Optical Properties of Hydrophilic Ag<sub>2</sub>Se NIR-II Quantum Dots by using Chemometric Approaches Towards (Bio)sensing Applications

Izabel G. de Souza Sobrinha,<sup>a</sup> Felipe Cunha da Silva Trindad,<sup>a</sup> Ingrid W. V. Gonçalves,<sup>a</sup> Claudete F. Pereira,<sup>a</sup> Goreti Pereira,<sup>a,b,#,\*</sup> and Giovannia A. L. Pereira<sup>a,#,\*</sup>

### Support Information

#### 1. Data from the 2<sup>4-1</sup> Fractional Factorial experimental design (experimental design 1)

| Assay | Reaction time (1) | [Ag <sup>+</sup> ] (2) | Temperature (3) | Ag:Se (4) | PL Intensity (a. u.) | FWHM PL (nm) |
|-------|-------------------|------------------------|-----------------|-----------|----------------------|--------------|
| 1     | -1                | 1                      | 1               | 1         | 12967.64             | 176          |
| 2     | 1                 | 1                      | 1               | 1         | 15049.893            | 162          |
| 3     | -1                | -1                     | 1               | -1        | 838984.418           | 290          |
| 4     | 1                 | -1                     | 1               | -1        | 1355719.47           | 310          |
| 5     | -1                | -1                     | -1              | 1         | 0                    | 500          |
| 6     | 1                 | -1                     | -1              | 1         | 0                    | 500          |
| 7     | -1                | 1                      | -1              | -1        | 0                    | 500          |
| 8     | 1                 | 1                      | -1              | -1        | 5650.2242            | 171          |
| 9     | -1                | 0                      | 0               | 0         | 2828.09545           | 240          |
| 10    | 1                 | 0                      | 0               | 0         | 2003.4364            | 231          |
| 11    | -1                | 1                      | 1               | 1         | 0                    | 500          |
| 12    | 1                 | 1                      | 1               | 1         | 0                    | 500          |
| 13    | -1                | -1                     | 1               | -1        | 268271.605           | 337          |
| 14    | 1                 | -1                     | 1               | -1        | 268271.605           | 337          |
| 15    | -1                | 1                      | -1              | -1        | 235.19229            | 169          |
| 16    | 1                 | 1                      | -1              | -1        | 837.8644             | 201          |
| 17    | -1                | 0                      | 0               | 0         | 79978.3044           | 343          |
| 18    | 1                 | 0                      | 0               | 0         | 89549.7627           | 358          |

PL Intensity = -162375.25\*[Ag<sup>+</sup>] + 178190.23\* (Temperature) -175528.45\* (Ag:Se) + 142092.26

#### 2. Data from the 2<sup>3</sup> Full factorial experimental design (experimental design 2)

| Assay | Reaction time (1) | Ag:Se (2) | MPA:Ag (3) | PL Intensity (a. u.) | FWHM PL (nm) |
|-------|-------------------|-----------|------------|----------------------|--------------|
| 1     | -1                | -1        | -1         | 31380.8715           | 163          |

|    |    |    |    |            |     |
|----|----|----|----|------------|-----|
| 2  | 1  | -1 | -1 | 47156.1969 | 142 |
| 3  | -1 | 1  | -1 | 58885.116  | 160 |
| 4  | 1  | 1  | -1 | 59366.1573 | 139 |
| 5  | -1 | -1 | 1  | 8378.60781 | 312 |
| 6  | 1  | -1 | 1  | 9230.3339  | 372 |
| 7  | -1 | 1  | 1  | 9388.79457 | 287 |
| 8  | 1  | 1  | 1  | 11092.2467 | 275 |
| 9  | -1 | 0  | 0  | 21505.3763 | 138 |
| 10 | 1  | 0  | 0  | 33022.0713 | 132 |
| 11 | -1 | -1 | -1 | 8546.97227 | 170 |
| 12 | 1  | -1 | -1 | 30969.1568 | 158 |
| 13 | -1 | 1  | -1 | 71505.3763 | 146 |
| 14 | 1  | 1  | -1 | 36078.0985 | 142 |
| 15 | -1 | -1 | 1  | 0          | 500 |
| 16 | 1  | -1 | 1  | 8546.97227 | 270 |
| 17 | -1 | 1  | 1  | 4981.60724 | 370 |
| 18 | 1  | 1  | 1  | 11438.8795 | 138 |
| 19 | -1 | 0  | 0  | 9230.3339  | 172 |
| 20 | 1  | 0  | 0  | 12795.6989 | 175 |
| 21 | -1 | 1  | -1 | 85512.1675 | 166 |
| 22 | 1  | 1  | -1 | 31692.1336 | 163 |

PL Intensity = 7696.3\*(2) - 17840.3\*(3) - 6230.8\*(1\*2) - 6353.1(2\*3) 6076.1\*(1\*2\*3) + 24405.6

FWHM PL = 78.64\*(3) + 220.33

### 3. Data from the 2<sup>3</sup> Central Composite experimental design (experimental design 3)

| Assay | pH (1) | Temperature (2) | Reaction time (3) | PL Intensity (a. u.) | FWHM PL (nm) |
|-------|--------|-----------------|-------------------|----------------------|--------------|
| 1     | -1     | -1              | -1                | 55301.3582           | 217          |
| 2     | -1     | -1              | 1                 | 284538.745           | 200          |
| 3     | -1     | 1               | -1                | 284772.653           | 139          |
| 4     | -1     | 1               | 1                 | 201816.667           | 138          |
| 5     | 1      | -1              | -1                | 59447.0046           | 181          |
| 6     | 1      | -1              | 1                 | 44789.9968           | 167          |
| 7     | 1      | 1               | -1                | 76582.2785           | 170          |
| 8     | 1      | 1               | 1                 | 38457.5967           | 195          |
| 9     | -1     | 0               | 0                 | 90349.0029           | 177          |
| 10    | 1      | 0               | 0                 | 63226.4529           | 173          |
| 11    | 0      | -1              | 0                 | 155036.598           | 176          |
| 12    | 0      | -1              | 0                 | 265126.557           | 155          |
| 13    | 0      | 1               | 0                 | 74008.9994           | 165          |
| 14    | 0      | 0               | -1                | 314920.013           | 136          |
| 15    | 0      | 0               | 1                 | 729818.491           | 136          |

|    |   |   |   |            |     |
|----|---|---|---|------------|-----|
| 16 | 0 | 0 | 1 | 719318.796 | 141 |
| 17 | 0 | 0 | 0 | 91105.0291 | 135 |
| 18 | 0 | 0 | 0 | 216611.173 | 149 |

$$\text{PL Intensity} = -244782.66*(1)^2 - 140122.50*(2)^2 + 263928.18*(3)^2 + 265666.30$$

$$\text{FWHM PL} = 26.49*(1)^2 - 11.73*(2) + 146.34$$
